# Supplementary material for: Obstructive Sleep Apnea Increases The Risk Of Osteoporosis In Patients With Chronic Obstructive Pulmonary Disease
Source: Research Square preprint supplement (doi:10.21203/rs.3.rs-8006611/v1), 2025-12-09
Supplement: Supplementary file 1 [file 575358ceb312ec54ed12b0ef.xlsx]

## Sheet: Sheet1
	Table 1. Patient demographics and baseline disease characteristics
	Characteristic	Total (n=305)	Non-OSA (n=60)	Mild OSA (n=91)	Moderate OSA (n=84)	Severe OSA (n=70)	p-value
	Age,mean(SD),years	74.10 (8.92)	71.00 (8.74)	73.64 (10.20)	75.26 (7.79)	75.96 (7.91)	0.007
	Gender
	female	69 (22.62)	11 (18.33)	30 (32.97)	15 (17.86)	13 (18.57)	0.047
	male	236 (77.38)	49 (81.67)	61 (67.03)	69 (82.14)	57 (81.43)
	height,mean(SD),cm	163.80 (11.22)	165.63 (6.11)	163.47 (7.77)	163.14 (7.83)	163.46 (19.15)	0.568
	weight,mean(SD),kg	56.12 (9.78)	55.93 (9.38)	55.88 (9.82)	55.27 (8.95)	57.63 (10.98)	0.501
	BMI,mean(SD),kg/m²	20.81 (3.31)	21.56 (3.31)	21.44 (2.85)	20.57 (3.41)	19.64 (3.45)	0.001
	AHI,mean (SD)	19.19 (16.27)	1.91 (1.52)	9.16 (2.90)	22.61 (4.63)	42.93 (12.25)	<0.001
	serium inorganic phosphorus,mean (SD),mmol/L	1.01 (0.24)	1.06 (0.20)	1.01 (0.22)	1.03 (0.28)	0.93 (0.21)	0.015
	Blood calcium,mean (SD),mmol/L	2.17 (0.20)	2.22 (0.14)	2.18 (0.21)	2.15 (0.25)	2.15 (0.17)	0.162
	Minimum blood oxygen,mean (SD),mmol/L	81.70 (8.22)	89.53 (6.87)	84.16 (4.67)	79.14 (5.31)	74.86 (8.85)	<0.001
	Smoke						0.759
	No(n,%)	274 (89.84)	54 (90.00)	83 (91.21)	73 (86.90)	64 (91.43)
	Yes(n,%)	31 (10.16)	6 (10.00)	8 (8.79)	11 (13.10)	6 (8.57)
	Drink						0.755
	No(n,%)	282 (92.46)	56 (93.33)	86 (94.51)	76 (90.48)	64 (91.43)
	Yes(n,%)	23 (7.54)	4 (6.67)	5 (5.49)	8 (9.52)	6 (8.57)
	High blood pressure						0.039
	No(n,%)	213 (69.84)	51 (85.00)	59 (64.84)	57 (67.86)	46 (65.71)
	Yes(n,%)	92 (30.16)	9 (15.00)	32 (35.16)	27 (32.14)	24 (34.29)
	Diabetes						0.5
	No(n,%)	274 (89.84)	53 (88.33)	84 (92.31)	77 (91.67)	60 (85.71)
	Yes(n,%)	31 (10.16)	7 (11.67)	7 (7.69)	7 (8.33)	10 (14.29)
	Coronary heart disease						0.159
	No(n,%)	265 (86.89)	55 (91.67)	78 (85.71)	76 (90.48)	56 (80.00)
	Yes(n,%)	40 (13.11)	5 (8.33)	13 (14.29)	8 (9.52)	14 (20.00)
	Cerebrovascular disease						0.979
	No(n,%)	279 (91.48)	55 (91.67)	84 (92.31)	76 (90.48)	64 (91.43)
	Yes(n,%)	26 (8.52)	5 (8.33)	7 (7.69)	8 (9.52)	6 (8.57)
	Dyslipidemia						0.768
	No(n,%)	288 (94.43)	57 (95.00)	84 (92.31)	80 (95.24)	67 (95.71)
	Yes(n,%)	17 (5.57)	3 (5.00)	7 (7.69)	4 (4.76)	3 (4.29)
	Chronic cough						0.047
	No(n,%)	302 (99.02)	60 (100.00)	91 (100.00)	81 (96.43)	70 (100.00)
	Yes(n,%)	3 (0.98)	0 (0.00)	0 (0.00)	3 (3.57)	0 (0.00)
	Diagnosis of osteoporosis						<0.001
	No(n,%)	191 (62.62)	48 (80.00)	73 (80.22)	43 (51.19)	27 (38.57)
	Yes(n,%)	114 (37.38)	12 (20.00)	18 (19.78)	41 (48.81)	43 (61.43)
	* Except where indicated otherwise, values are the number (%).OSA=obstructive sleep apnea syndrome;AHI=apnea hypopnea index; BMI=body mass index.

## Sheet: myTable
			0	1	2	3		Overall
Characteristic			60	91	84	70	p-value	305
ahi (mean (SD))			1.91 (1.52)	9.16 (2.90)	22.61 (4.63)	42.93 (12.25)	<0.001	19.19 (16.27)
height (mean (SD))			165.63 (6.11)	163.47 (7.77)	163.14 (7.83)	163.46 (19.15)	0.568	163.80 (11.22)
weight (mean (SD))			55.93 (9.38)	55.88 (9.82)	55.27 (8.95)	57.63 (10.98)	0.501	56.12 (9.78)
smoke (%)	0		54 (90.00)	83 (91.21)	73 (86.90)	64 (91.43)	0.759	274 (89.84)
	1		6 (10.00)	8 (8.79)	11 (13.10)	6 (8.57)		31 (10.16)
drink (%)	0		56 (93.33)	86 (94.51)	76 (90.48)	64 (91.43)	0.755	282 (92.46)
	1		4 (6.67)	5 (5.49)	8 (9.52)	6 (8.57)		23 (7.54)
age (mean (SD))			71.00 (8.74)	73.64 (10.20)	75.26 (7.79)	75.96 (7.91)	0.007	74.10 (8.92)
sex (%)	0		11 (18.33)	30 (32.97)	15 (17.86)	13 (18.57)	0.047	69 (22.62)
	1		49 (81.67)	61 (67.03)	69 (82.14)	57 (81.43)		236 (77.38)
high_blood_pressure (%)	0		51 (85.00)	59 (64.84)	57 (67.86)	46 (65.71)	0.039	213 (69.84)
	1		9 (15.00)	32 (35.16)	27 (32.14)	24 (34.29)		92 (30.16)
diabetes (%)	0		53 (88.33)	84 (92.31)	77 (91.67)	60 (85.71)	0.5	274 (89.84)
	1		7 (11.67)	7 (7.69)	7 (8.33)	10 (14.29)		31 (10.16)
coronary_heart_disease (%)	0		55 (91.67)	78 (85.71)	76 (90.48)	56 (80.00)	0.159	265 (86.89)
	1		5 (8.33)	13 (14.29)	8 (9.52)	14 (20.00)		40 (13.11)
cerebrovascular_disease (%)	0		55 (91.67)	84 (92.31)	76 (90.48)	64 (91.43)	0.979	279 (91.48)
	1		5 (8.33)	7 (7.69)	8 (9.52)	6 (8.57)		26 (8.52)
dyslipidemia (%)	0		57 (95.00)	84 (92.31)	80 (95.24)	67 (95.71)	0.768	288 (94.43)
	1		3 (5.00)	7 (7.69)	4 (4.76)	3 (4.29)		17 (5.57)
chronic_cough (%)	0		60 (100.00)	91 (100.00)	81 (96.43)	70 (100.00)	0.047	302 (99.02)
	1		0 (0.00)	0 (0.00)	3 (3.57)	0 (0.00)		3 (0.98)
serium_inorganic_phosphorus (mean (SD))			1.06 (0.20)	1.01 (0.22)	1.03 (0.28)	0.93 (0.21)	0.015	1.01 (0.24)
blood_calcium (mean (SD))			2.22 (0.14)	2.18 (0.21)	2.15 (0.25)	2.15 (0.17)	0.162	2.17 (0.20)
diagnosis_of_osteoporosis (%)	0		48 (80.00)	73 (80.22)	43 (51.19)	27 (38.57)	<0.001	191 (62.62)
	1		12 (20.00)	18 (19.78)	41 (48.81)	43 (61.43)		114 (37.38)
BMI (mean (SD))			21.56 (3.31)	21.44 (2.85)	20.57 (3.41)	19.64 (3.45)	0.001	20.81 (3.31)
OSA (mean (SD))			0.00 (0.00)	1.00 (0.00)	2.00 (0.00)	3.00 (0.00)	<0.001	1.54 (1.05)
